1 **Gasotransmitter H<sub>2</sub>S accelerates seed germination via activating AOX mediated**  
2 **cyanide-resistant respiration pathway**

3 Huihui Fang<sup>#1\*</sup>, Ruihan Liu<sup>#1</sup>, Zhenyuan Yu<sup>1</sup>, Gang Wu<sup>1</sup>, Yanxi Pei<sup>2\*</sup>

4 <sup>1</sup>Laboratory of Plant Molecular and Developmental Biology, Collaborative Innovation Center  
5 for Efficient and Green Production of Agriculture in Mountainous Areas of Zhejiang Province,  
6 College of Horticulture Science, Zhejiang Agriculture and Forestry University, Hangzhou,  
7 Zhejiang, 311300, China

8 <sup>2</sup>School of Life Science and Shanxi Key Laboratory for Research and Development of Regional  
9 Plants, Shanxi University, Taiyuan, Shanxi, 030006, China

10 <sup>#</sup>These authors contribute equally to this work.

11 <sup>\*</sup>Corresponding author: Huihui Fang email, [fanghh@zafu.edu.cn](mailto:fanghh@zafu.edu.cn);

12 **Running title:** H<sub>2</sub>S activates AOX to accelerate seed germination

13 **Highlight:** Gasotransmitter H<sub>2</sub>S provokes AOX mediated cyanide-resistant respiration,  
14 mainly through both long-term (up-regulating *AOX1A* expression) and short-term (inducing  
15 post-translational activation of AOX) regulatory modes, to accelerate seed germination.

16  
17  
18 **Abstract**

19 Hydrogen sulfide (H<sub>2</sub>S) has been witnessed as a crucial gasotransmitter involving in  
20 various physiological processes in plants. H<sub>2</sub>S signaling has been reported to involve in  
21 regulating seed germination, but the underlying mechanism remains poorly understood. Here,  
22 we found that endogenous H<sub>2</sub>S production was activated in germinating Arabidopsis seeds,  
23 correlating with upregulated both the transcription and the activity of enzymes (LCD and DES1)  
24 responsible for H<sub>2</sub>S production. Moreover, NaHS (the H<sub>2</sub>S donor) fumigation significantly  
25 accelerated seed germination, while H<sub>2</sub>S-generation defective (*lcd/des1*) seeds exhibited  
26 decreased germination speed. Further results indicated that the alternative oxidase (AOX), a  
27 cyanide-insensitive terminal oxidase, can be stimulated by imbibition, and the expression of  
28 *AOX* genes was provoked lag behind H<sub>2</sub>S production during germination. Additionally,  
29 exogenous H<sub>2</sub>S fumigation significantly reinforced imbibition induced enhancement of *AOX1A*  
30 expression, and mediated post-translational modification to keep AOX in its reduced and active  
31 state, which mainly involved H<sub>2</sub>S induced increase of the GSH/GSSG ratio and the cell

32 reducing power. Consequently, H<sub>2</sub>S signaling acts as a trigger to induce AOX mediated  
33 cyanide-resistant respiration to accelerate seed germination. Our study correlates H<sub>2</sub>S signaling  
34 to cyanide metabolism, which also participates in endogenous H<sub>2</sub>S generation, providing  
35 evidence for more extensive studies of H<sub>2</sub>S signaling.

36

37 **Keywords:** Gasotransmitter, Hydrogen sulfide, Alternative oxidase, Cyanide-resistant pathway,  
38 Cell reducing power, Seed germination

39

## 40 1. Introduction

41 Seed germination, a crucial stage of plant life cycle, is of major importance for early  
42 seedling emergence and is the first step to achieve high crop yield and quality (Rajjou *et al.*,  
43 2012; Finch-Savage and Bassel, 2016), so understanding the potential molecular mechanism of  
44 seed germination has great significance. Hydrogen sulfide (H<sub>2</sub>S), alongside nitric oxide (NO)  
45 and carbon monoxide (CO), has been recognized as a multifunctional gasotransmitter that plays  
46 crucial roles in plants development and stresses responses (Wang, 2002; Yang *et al.*, 2004; Arif  
47 *et al.*, 2021; Liu *et al.*, 2021; Zhang *et al.*, 2021). The possible involvement of H<sub>2</sub>S signaling in  
48 seed germination has been reported (Baudouin *et al.*, 2016; Zhou *et al.*, 2018; Chen *et al.*, 2019);  
49 however, the underlying metabolism has not been thoroughly elucidated to date.

50 In plants, both nonenzymatic and enzymatic pathways are responsible for H<sub>2</sub>S generation,  
51 although the nonenzymatic pathway only accounts for a small portion of H<sub>2</sub>S sources (Jin and  
52 Pei, 2015). Enzymes that produce endogenous H<sub>2</sub>S in plants can be roughly divided into two  
53 major categories, the cysteine desulfhydrases (CDes) and O-acetyl-L-serine (thiol) lyase  
54 (OASTL). For the former case, CDes degrade cysteine into H<sub>2</sub>S, ammonia, and pyruvate in a  
55 stoichiometric ratio of 1:1:1, while for the latter case, free H<sub>2</sub>S appears to be released only in a  
56 side reaction of the incorporation of inorganic S into cysteine mediated by OASTL (Liu *et al.*,  
57 2021; Zhang *et al.*, 2021). Specially, Alvarez *et al.* (2010) characterized a novel L-cysteine  
58 desulfhydrase (EC 4.4.1.1) DES1, which is an O-acetylserine(thiol)lyase homolog based on its  
59 sequence feature but exhibits higher CDes activity and has a much higher affinity to L-cysteine,  
60 mediating the generation of H<sub>2</sub>S in the cytosol (Alvarez *et al.*, 2010). Even more to the point,  
61 the  $\beta$ -cyanoalanine synthase ( $\beta$ -CAS), which mediates a principal route for cyanide metabolism  
62 in plants, could also induce H<sub>2</sub>S generation by catalyzing the conversion of cysteine and cyanide

63 to H<sub>2</sub>S and β-cyanoalanine, a process that acting as an important linker in regulating cyanide  
64 detoxification and H<sub>2</sub>S generation (Garcia *et al.*, 2010; Romero *et al.*, 2014).

65 The potential physiological and molecular role of cyanide in plants development and stress  
66 responses has been noted, although most cyanide would be rapidly detoxified and metabolized  
67 to keep its concentration below toxic levels (Garcia *et al.*, 2010). Several pieces of research  
68 have suggested the emission of cyanide during the pre-germination period of many seeds  
69 (Bethke *et al.*, 2006; Esashi *et al.*, 2006), and the released cyanide in germinating seeds may  
70 help break dormancy and promote germination (Oracz *et al.*, 2009; Gniazdowska *et al.*, 2010;  
71 Oracz *et al.*, 2008; Dobrzynska *et al.*, 2005). It is well known that cyanide binds irreversibly to  
72 the heme iron of terminal cytochrome c oxidase (COX) in the mitochondrial electron transport  
73 chain, thereby blocking electron transfer from reduced cytochrome c to oxygen (Solomonson,  
74 1981; Vennesland, 1981). However, an alternative electron-transfer pathway is insensitive to  
75 cyanide, which is known as cyanide-resistant respiration pathway. Correspondingly, the  
76 cyanide-resistant respiration, a respiration alternative pathway, has been reported to be  
77 triggered by seed imbibition (Esashi *et al.*, 1979; Burguillo and Nicolas, 1977). Subsequently,  
78 a pending question of the relationship between H<sub>2</sub>S signaling and cyanide-resistant respiration  
79 during seed germination attracts our attention.

80 Cyanide-resistant respiration involves a cyanide-insensitive terminal oxidase, the  
81 alternative oxidase (AOX) (LATIES and GG, 1982; Vanlerberghe *et al.*, 1994), which provides  
82 a parallel pathway for mitochondrial electron flow, bypassing complexes III and IV, and results  
83 in cyanide-resistant respiration. To a certain extent, the AOX activity could represent the degree  
84 of the involvement of cyanide-resistant respiration. AOX is a nuclear-encoded mitochondrial  
85 protein, which exists as a dimer in the inner mitochondrial membrane and has two states, the  
86 oxidized state in which the dimer is covalently cross-linked by a disulfide bridge (-S-S-), and  
87 the reduced state (-SH HS-) maintained through non-covalent interaction. The reduced AOX  
88 form can be four- to five-fold more active than the oxidized dimeric AOX (Moore *et al.*, 1995;  
89 Sluse and Jarmuszkiewicz, 1998; Day and Wiskich, 1995), so the activity of AOX can be  
90 regulated by its redox state and the ratio of reduced form to oxidized dimeric form.

91 In this study, the correlation between H<sub>2</sub>S signaling and AOX mediated cyanide-resistant  
92 respiration during seed germination was widely explored. We found that H<sub>2</sub>S could enhance the  
93 cyanide-resistant respiration in germinating seeds by reinforcing the increase of *AOX1A*

94 expression and mediating post-transcriptional modification on AOX to maintain more AOX in  
95 its reduced and active state, which provides molecular evidence for understanding the  
96 mechanism of the gasotransmitter H<sub>2</sub>S in the acceleration of seed germination by activating the  
97 cyanide-resistant respiration. Our study provides a body of evidence for demonstrating the  
98 function of H<sub>2</sub>S signaling in regulating respiratory pattern in germinating seeds, and correlates  
99 the H<sub>2</sub>S signaling to cyanide metabolism, which also participates in endogenous H<sub>2</sub>S generation,  
100 providing evidence for more extensive studies of H<sub>2</sub>S signaling.

101

## 102 **2. Materials and Methods**

### 103 2.1 Plant Materials and treatments

104 The seeds of *A. thaliana* Wild type (WT, Columbia, Col-0), the *lcd/des1* double mutants  
105 (*lcd/des1*), and the transgenic plants over-expressing DES1 (OE-*DES1*) were used in this study.  
106 The *lcd/des1* double mutant was obtained by crossing the *LCD* T-DNA insertion mutant *lcd*  
107 (SALK\_082099) with the *DES1* defective mutant *des1* (SALK\_205358C). The *DES1* over-  
108 expression transgenic plants (OE-*DES1*) were generated as described previously (Zengjie *et al.*,  
109 2015).

110 For germination tests, seeds were stratified at 4°C for 48 h, then germinated in the Petri  
111 dishes on 3 layers of filter papers soaked by ½ Murashige-Skoog (½ MS) fluid medium, 100  
112 seeds per dish, and each kind of seeds or treatment had 3 replicates. All dishes were  
113 subsequently kept in a 16 h/8 h (light/dark) photoperiod with a light illumination of 160 Em<sup>-2</sup>s<sup>-1</sup>  
114 at 23°C and 60% relative humidity. The seed germination was analyzed over time, and the  
115 germination percentage was assessed by measuring the rate of testa ruptured seeds, described  
116 in the Fig. 5 (Fig. 5).

117 For exogenous H<sub>2</sub>S fumigation treatment, the seeds were successively fumigated with H<sub>2</sub>S  
118 released by the donor NaHS immediately after being placed on the filter paper. The NaHS  
119 solution-containing tube was placed into the Petri dishes, which were then sealed with parafilm.  
120 Every fumigation lasted for 12 hours, with an interval of 24 hours between fumigations.

### 121 2.2. Measurement of the H<sub>2</sub>S production rate and endogenous H<sub>2</sub>S content

122 To confirm whether the endogenous H<sub>2</sub>S signaling participates in regulating seed  
123 germination, the endogenous H<sub>2</sub>S production rate and H<sub>2</sub>S content in germinating seeds were  
124 measured. Total protein extracts were collected from seeds at various time points after water

125 imbibition, then cysteine was added as a substrate in the extracts to determine the production  
126 rate of H<sub>2</sub>S mediated by CDes according to previously described methods (Fang *et al.*, 2017;  
127 Jin *et al.*, 2013). The endogenous H<sub>2</sub>S content was detected using a novel polarographic H<sub>2</sub>S  
128 sensor (WPI, TBR4100, Sarasota, FL, USA). Briefly, 0.1 g seeds were frozen and ground in  
129 liquid nitrogen, then 1 mL PBS buffer (0.05 mol L<sup>-1</sup>, pH 6.8, containing 0.2 mol L<sup>-1</sup> AsA and  
130 0.1 mol L<sup>-1</sup> EDTA), was added to the well-ground powder, then the suspensions were taken to  
131 determine H<sub>2</sub>S content according to a previous publication (Liu *et al.*, 2019).

### 132 2.3 Total RNA extraction and real-time quantitative RT-PCR

133 Total RNA was extracted from imbibed seeds using RNAiso plus reagent (TaKaRa, Shiga,  
134 Japan, Cat9109) according to the manufacturer's instructions. The cDNA was synthesized using  
135 a reverse transcription system kit (PrimeScript RT Reagent Kit, TaKaRa, RR037B) and  
136 oligo(dT) primers, and then the real-time quantitative RT-PCR (qRT-PCR) was performed to  
137 detect the mRNA level of target genes according to the instructions of the Bio-Rad Real-Time  
138 System (CFX96TM C1000 Thermal Cycler), then the relative expression of target genes was  
139 calculated by using the 2<sup>- $\Delta\Delta$ Ct</sup> method. All of the primer pairs used for qRT-PCR were checked  
140 for amplification specificity and were listed in Table 1. Ubiquitin4 (UBQ4, At5g20620) was  
141 used as the internal control.

### 142 2.4 Determination of the GSH and GSSG content

143 The contents of the reduced GSH and oxidized form GSSG were measured using a GSH  
144 and GSSG assay kit S0053 (Beyotime Institute of Biotechnology, China) based on a previously  
145 described method (Fang *et al.*, 2014), and then the ratio of GSH/GSSG was calculated.

### 146 2.5 Assay of the AOX concentration and its redox state

147 The AOX concentration during seed germination was determined using the plant  
148 alternative oxidase (AOX) ELISA Kit (YS07118B, GTX, China) according to the  
149 manufacturer's instructions. The AOX concentration was then calculated by comparing the  
150 optical density of the samples to the standard curve of the AOX level.

151 The AOX is a mitochondrial protein, so the mitochondria were isolated and purified from  
152 imbibed seeds following a protocol described previously (Jin *et al.*, 2018). All steps involved  
153 in isolating mitochondria were conducted at 4°C. As the AOX activity is regulated by its redox  
154 state, the effects of H<sub>2</sub>S fumigation on the redox state of AOX were detected by reducing SDS-  
155 PAGE and Western blotting using a plant AOX antibody (AS05054 Anti-AOX, Agrisera,

156 Sweden). By comparing the distribution of dimer AOX and monomer AOX, the changes of  
157 AOX activity were monitored.

## 158 2.6 Statistical analysis

159 Three independent biological replicates were performed on each experiment, and the  
160 results were expressed as the means  $\pm$  standard error (SE). The statistically significant  
161 differences were analyzed by one-way analysis of variance (ANOVA) using SPSS (version 17,  
162 IBM SPSS, Chicago, IL, USA), and error bars were calculated based on Tukey's multiple range  
163 test ( $P < 0.05$ ).

## 164 Results

### 165 1. Production of endogenous H<sub>2</sub>S was increased during seed germination

166 To confirm the involvement of endogenous H<sub>2</sub>S signaling in regulating seed germination,  
167 we assessed the time-course expression of genes responsible for endogenous H<sub>2</sub>S generation in  
168 seeds processing to germination, including *LCD*, *DESI*, *OASTL-A1*, *OASTL-B*, *OASTL-C*,  
169 *CYSC1*, *CYS-D1*, and *CYS-D2*. As shown in Fig. 1A, the expression of *DESI*, *LCD*, *OASTL-B*,  
170 and *OASTL-C* were up-regulated by various degrees with the extension of seed imbibition. The  
171 expression of *DESI* and *LCD* increased almost immediately after imbibition, and were  
172 maintained at higher levels in imbibed seeds. The *OASTL-C* expression showed an obvious up-  
173 regulation after 6 hours of imbibition and the *OASTL-B* expression was only slightly enhanced  
174 during germination (Fig. 1A). Notably, there were no significant changes in the expression of  
175 *CYSC1*, *CYS-D1*, and *CYS-D2*, genes encoding  $\beta$ -CAS, during germination processing (Fig.  
176 1A). In addition, the activity of total CDes was assayed by detecting the production rate of  
177 endogenous H<sub>2</sub>S generated from L-cysteine and D-cysteine, and our data showed that the  
178 production rate of endogenous H<sub>2</sub>S raised dramatically during the first 24 hours of imbibition.  
179 Although a slight decrease occurred after 48 hours of imbibition, the H<sub>2</sub>S production rate was  
180 still significantly higher than that before imbibition (Fig. 1B). Consistently with the increase of  
181 the transcription of genes associated with endogenous H<sub>2</sub>S production and the activities of the  
182 CDes, the endogenous H<sub>2</sub>S content also exhibited a conspicuous increase followed by a slight  
183 decline with the process of seeds imbibition (Fig. 1B). These data suggested that imbibition  
184 stimulates the generation of endogenous H<sub>2</sub>S, which might act importantly in regulating seed  
185 germination.

### 186 2. H<sub>2</sub>S signaling participates in the regulation of seed germination

187 In order to investigate the significance of gasotransmitter H<sub>2</sub>S in regulating seed  
188 germination, we examined the effects of exogenous H<sub>2</sub>S at different concentrations (0, 3, 6, 9,  
189 12, 15, 18, 21 μmol L<sup>-1</sup>) on the speed of seeds germination, and the sodium hydrosulfide (NaHS)  
190 was employed as exogenous H<sub>2</sub>S donor. As is shown in Fig. 2A, within a certain range of  
191 concentrations, exogenous H<sub>2</sub>S fumigation could accelerate seed germination in a  
192 concentration-dependent manner, and the positive effect of H<sub>2</sub>S on seed germination was  
193 strengthened with the increase of H<sub>2</sub>S concentration (Fig. 2A). Importantly, exogenous H<sub>2</sub>S  
194 fumigation with lower concentration (below 15 μmol L<sup>-1</sup>) can only improve the germination  
195 speed, but not the final germination rate (Fig. 2A and 2B). However, H<sub>2</sub>S fumigation with higher  
196 concentrations, 18 μmol L<sup>-1</sup> and 21 μmol L<sup>-1</sup>, can obviously delay seed germination and reduce  
197 the final germination rate (Fig. 2A). Based on our data, 12 μmol L<sup>-1</sup> of NaHS was used for  
198 subsequent H<sub>2</sub>S fumigation as exogenous H<sub>2</sub>S with this concentration exhibited most significant  
199 effect on promoting seed germination (Fig. 2A).

200 Fumigation of WT seeds with 12 μmol L<sup>-1</sup> of exogenous H<sub>2</sub>S could obviously accelerate  
201 seed germination by observing that H<sub>2</sub>S fumigation improved the percentage of germinated  
202 seeds at every time point during imbibition and significantly reduced the time to have 50%  
203 germinated seeds (T<sub>50</sub>) (Fig. 2B). Correspondingly, the *DESI* over-expressed transgenic seeds  
204 (OE-*DESI*) exhibited higher germination speed and faster to get 50% seeds germinated, while  
205 impairment of endogenous H<sub>2</sub>S accumulation by inducing mutation in *LCD* and *DESI* (*lcd/desi1*)  
206 delayed germination speed and the T<sub>50</sub> of *lcd/desi1* seeds increased by 46.37% in comparison  
207 with WT (Fig. 2B and 2C). The phenotypes of germinated seeds after 60 hours of imbibition  
208 also confirmed the importance of H<sub>2</sub>S in promoting seeds germination (Fig. 2D). These data  
209 indicated that H<sub>2</sub>S signaling functions significantly during seed germination as exogenous H<sub>2</sub>S  
210 treatment or modulation of endogenous H<sub>2</sub>S level can obviously affect the germination speed.

### 211 **3. Gasotransmitter H<sub>2</sub>S acts as a trigger of the cyanide-resistant respiration in** 212 **germinating seeds**

213 It has been reported that cyanide production would be enhanced during seed imbibition and  
214 germination (Yu *et al.*, 2021). As the cyanide level affects the intensity of COX respiratory  
215 pathway through blocking electron flow, and cyanide detoxication mediated by β-CAS links  
216 the modulation of cyanide level to endogenous H<sub>2</sub>S generation. Therefore, the effects of  
217 exogenous and endogenous H<sub>2</sub>S on alternative oxidase (AOX), the respiratory terminal oxidase

218 catalyzing the cyanide-resistant respiration, were investigated in germinating seeds. We can see  
219 from the blue column in Fig. 3 that the expression of *AOX1A*, *AOX1B* and *AOX1C* were up-  
220 regulated gradually with the prolongation of imbibition time (Fig. 3A, 3B, and 3C), therefore,  
221 we compared the imbibition induced activation of H<sub>2</sub>S signaling and AOX mediated cyanide-  
222 resistant respiration, reflected by the generation of endogenous H<sub>2</sub>S and the expression of *AOX*  
223 genes, respectively. As shown in Fig. 3D, the up-regulation of AOX genes expression lagged  
224 behind the increase of the expression of H<sub>2</sub>S-generation-associated genes and the content of  
225 endogenous H<sub>2</sub>S during seed germination (Fig. 3D). The expression of *AOX1A*, *AOX1B* and  
226 *AOX1C* were up-regulated significantly after 12 hours of imbibition (Fig. 3A, 3B, and 3C),  
227 while *DESI* and *LCD* expression as well as the endogenous H<sub>2</sub>S content exhibited a substantial  
228 increase almost immediately after imbibition, and followed by a longer duration of the high  
229 levels (Fig. 1A, 1B and Fig. 3D). Furthermore, exogenous H<sub>2</sub>S fumigation strengthened the  
230 increase of *AOX1A* and *AOX1B* expression in germinating seeds, especially in the case of  
231 *AOX1A* (Fig. 3A). Importantly, modulation of endogenous H<sub>2</sub>S level can also regulate the  
232 *AOX1A* expression during seed germination. The OE-*DESI* seeds showed obviously higher  
233 level of *AOX1A* transcription in comparison with WT, while *lcd/desi* seeds had decreased  
234 *AOX1A* expression in germinating seeds. These data suggested that the generation of  
235 endogenous H<sub>2</sub>S is induced by imbibition, and this activated H<sub>2</sub>S signaling functions as a trigger  
236 to up-regulate the subsequent expression of *AOX1A*, hinting that H<sub>2</sub>S might regulate the  
237 proportion of cyanide-resistant respiration by inducing AOX in germinating seeds.

#### 238 **4. H<sub>2</sub>S regulates the cell redox state to maintain the AOX in its active and reduced state**

239 To detect the effects of H<sub>2</sub>S on the protein level of AOX, we investigated the AOX  
240 concentration using the plants AOX ELISA Kit. Based on our data, it could be seen that  
241 exogenous H<sub>2</sub>S fumigation enhanced the abundance of AOX in germinated seeds.  
242 Correspondingly, the AOX protein level was slightly higher in the germinated OE-*DESI* seeds,  
243 and lower in the germinated *lcd/desi* seeds (Fig. 4A).

244 It has been widely confirmed that two types of dimeric AOX structures exist. The oxidized  
245 AOX form (-S-S-) is inactivated when a highly conserved cysteine residue is oxidized to  
246 covalently link the enzyme, while the reduced AOX dimer (-SH HS-) is more active than the  
247 oxidized form (Umbach and Siedow, 1993; Moore *et al.*, 1995). Therefore, the activity of AOX  
248 is greatly dependent on its redox state, correlating with the reduction of a regulatory disulfide



249 bond (Sluse and Jarmuszkiewicz, 1998). Control of the redox state of AOX could be a powerful  
250 mechanism of regulating its activity *in vivo*, which links the activity of AOX to the general  
251 redox state of the cell (Umbach and Siedow, 1997; Sluse and Jarmuszkiewicz, 1998), so the  
252 effects of H<sub>2</sub>S on the redox state of AOX and the general redox state of the cell were investigated.  
253 We found that H<sub>2</sub>S fumigation could promote the accumulation of reduced GSH (Fig. 4B),  
254 concomitant with a marked increase of the ratio of GSH/GSSG (Fig. 4C), suggesting that  
255 gasotransmitter H<sub>2</sub>S might improve the cell reducing power by enhancing GSH accumulation.  
256 Moreover, the non-reducing SDS-PAGE western blot was used for detecting the dimer AOX (-  
257 S-S-) and monomer AOX (-SH HS-), and data indicated that both H<sub>2</sub>S and GSH treatment could  
258 enhance the level of reduced monomer AOX to various degrees, and increase the proportion of  
259 reduced AOX in germinated seeds (Fig. 4D).

260 Given all that, gasotransmitter H<sub>2</sub>S can enhance the reducing power of the cell to mediate  
261 the post-translational modification on AOX to maintain the X in its reduced and active state,  
262 which has great significance in activating the cyanide-resistant respiration during seed  
263 germination.

264

## 265 Discussion

266 The physiological functions of H<sub>2</sub>S as a vital gasotransmitter in plant development and  
267 environmental response have been widely reported (Jin and Pei 2015; Corpas, 2019; Liu *et al.*,  
268 2021). Several studies have confirmed the involvement of H<sub>2</sub>S signaling in seed germination  
269 (Zhang *et al.*, 2008; Zhang *et al.*, 2010; Zhang *et al.*, 2010; Li *et al.*, 2012; Dooley *et al.*, 2013),  
270 while the underlying mechanism of H<sub>2</sub>S signaling promoting seed germination remains a  
271 mystery.

272 In our study, fumigation with NaHS, an exogenous H<sub>2</sub>S donor, accelerated seed  
273 germination in a dose-dependent manner (Fig. 2A). Therefore, it was believed that within its  
274 physiological concentration scope, H<sub>2</sub>S can accelerate seed germination and this positive effect  
275 was reinforced with the increase of H<sub>2</sub>S concentration (Fig. 2A). Importantly, H<sub>2</sub>S treatment  
276 with physiological concentration can only improve the germination speed, but not the final  
277 germination rate (Fig. 2A and 2B). However, fumigation with high concentrations of H<sub>2</sub>S (18  
278 and 21 μmol L<sup>-1</sup>), exceeding the physiological concentration scope, exhibited an inhibitory  
279 effect on both the germination speed and the final germination probability (Fig. 1A), so 18 and

280 21  $\mu\text{mol L}^{-1}$  were considered as the toxic concentration of  $\text{H}_2\text{S}$ . Endogenously, a marked up-  
281 regulation of the *DES1* and *LCD* transcription (Fig. 1A) as well as a significant enhancement  
282 of total CDes activity (Fig. 1B) were observed during seed germination, which acts importantly  
283 in affording for the increase of endogenous  $\text{H}_2\text{S}$  content in imbibed seeds. The decelerated  
284 germination (Fig. 2B) and the increased time of obtaining 50% of germinated seeds (Fig. 2C)  
285 in *lcd/des1* seeds indicating that the  $\text{H}_2\text{S}$  production mediated by DES1 and LCD plays a crucial  
286 role in ensuring successful germination. Collectively, our data confirmed the positive  
287 involvement of  $\text{H}_2\text{S}$  signaling in accelerating seed germination from both the exogenous and  
288 endogenous perspectives.

289  $\beta$ -CAS is the key enzyme for cyanide detoxification in plants, and  $\text{H}_2\text{S}$  is accompanied by  
290 cyanide detoxification (Lai *et al.*, 2009; Alvarez *et al.*, 2012; Garcia *et al.*, 2010). Interestingly,  
291 data in our study indicated that the expression of *CYS* genes responsible for encoding  $\beta$ -CAS,  
292 including *CYS-C1*, *CYS-D1*, and *CYS-D2*, exhibited a slight increase trend in germinating  
293 seeds, but the changes were not significant (Fig. 1A), suggesting that the  $\beta$ -CAS pathway  
294 contributes little to the increase of endogenous  $\text{H}_2\text{S}$  production in imbibed seeds. Importantly,  
295 these data also hint the nonfeasance of cyanide detoxification during seed germination, which  
296 seems to be consistent with the functions of cyanide in seed germination reported previously.  
297 It has been reported that the emission of HCN occurs during the pre-germination period of  
298 many seeds (Esashi *et al.*, 2006), and the cyanide could involve in regulating dormancy-release  
299 and seed germination (Taylorson and Hendricks, 1973; Oracz *et al.*, 2008). Generally speaking,  
300 cyanide is mostly correlated with the inhibition of the terminal cytochrome oxidase (COX) in  
301 the mitochondrial respiratory pathways, so the increase of cyanide level usually implies the  
302 inhibition of COX respiratory system. Additionally, the increased endogenous  $\text{H}_2\text{S}$ , mainly  
303 mediated by LCD and DES1, will feedback inhibit  $\beta$ -CAS mediated  $\text{H}_2\text{S}$  production and might  
304 lead to the decrease of cyanide detoxification, which provides the possibility that  $\text{H}_2\text{S}$  might  
305 regulate the proportion of cyanide-resistant respiration through modulating cyanide content.  
306 The AOX, also known as alternate oxidase, is plant-specific cyanide insensitive terminal  
307 oxidase and responsible for the activity of cyanide-resistant respiration pathway (Vanlerberghe  
308 and McIntosh, 1997; Vanlerberghe *et al.*, 2010). In our study, both the gene transcription and  
309 protein abundance of AOX were enhanced in germinating seeds, suggesting that increasing of  
310 AOX respiration and partial blocking of the COX respiration might be necessary for successful

311 seed germination.

312 The correlation between endogenous H<sub>2</sub>S production and cyanide detoxification attracts  
313 us to study the relationship between H<sub>2</sub>S signaling and cyanide-resistant respiration. In our  
314 study, both the endogenous H<sub>2</sub>S content and AOX protein level could be significantly increased  
315 by imbibition. Moreover, endogenous H<sub>2</sub>S generation was provoked earlier than AOX genes  
316 expression (Fig. 3A), which led us to determine the effects of H<sub>2</sub>S signaling on the subsequent  
317 AOX activation during seed germination. Our data verified that fumigation with 12 μmol L<sup>-1</sup>  
318 NaHS extremely improved both the transcription level and protein abundance of AOX (Fig. 3B  
319 and Fig. 4 A). The *AOX1A* expression and AOX protein level were slightly enhanced in the  
320 germinating OE-*DES1* seeds while significantly weakened in the germinating *lcd/des1* seeds  
321 (Fig. 3B and Fig. 4 A). Consequently, the DES1/LCD mediated H<sub>2</sub>S signaling functions as a  
322 trigger to activate AOX, and thus the cyanide-resistant respiration, involving in promoting seed  
323 germination. Innovatively, our study provides important bases for the regulatory effects of H<sub>2</sub>S  
324 signaling on respiration pattern, which might involve improving the ratio of AOX mediated  
325 cyanide-resistant respiration, during seed germination.

326 It has been reported that short keto-carboxylic acids could activate AOX, among which,  
327 the pyruvate is the most effective one (Harvey *et al.*, 1993; Millar *et al.*, 1996). As we all known,  
328 pyruvate could be produced as a by-product in *LCD* and *DES1* mediated H<sub>2</sub>S production (Jin  
329 and Pei, 2015; Liu *et al.*, 2021), so based on our data, the enhancement of DES1/LCD mediated  
330 H<sub>2</sub>S generation in imbibed seeds means that the production of pyruvate will also increase during  
331 seed germination. Therefore, it is likely that the enhanced AOX activity during seed  
332 germination could partly be attributed to pyruvate produced along with H<sub>2</sub>S generation.  
333 Nonetheless, the gasotransmitter H<sub>2</sub>S still plays a dominant role in AOX activation as the  
334 positive effect of exogenous H<sub>2</sub>S on activating AOX transcription and translation is  
335 significantly higher than endogenously overexpressing *DES1* (Fig. 3B and Fig. 4A).

336 It has been reported that H<sub>2</sub>S could regulate the redox state of cells by regulating both the  
337 activities of antioxidative enzymes and the contents of non-enzymatic antioxidants (Bhardwaj  
338 and Kapoor, 2021; Liu *et al.*, 2021). Recently, H<sub>2</sub>S was found to mediate persulfidation (S-  
339 sulfidation), an oxidative post-translational modification of cysteine residues (-SH) to  
340 persulfides (-SSH), to enhance the activities of antioxidative enzymes, which is the classic  
341 enzyme-dependent pathway of ROS scavenging by H<sub>2</sub>S (Aroca *et al.*, 2015; Aroca *et al.*, 2018;

342 Corpas *et al.*, 2019; Palma *et al.*, 2020; Corpas, 2019). The AOX activity is highly dependent  
343 on its redox state, so we studied the effects of H<sub>2</sub>S on the redox state of AOX. In our study, H<sub>2</sub>S  
344 could enhance the level of reduced GSH and the ratio of GSH/GSSG (Fig. 4B and 4C).  
345 Furthermore, both H<sub>2</sub>S and GSH could increase the content of monomer AOX (-SH HS-), and  
346 keep more AOX in its reduced and activated state (Fig. 4D). Collectively, H<sub>2</sub>S could act as a  
347 signal molecule to redox-regulate AOX activity during seed germination, which might correlate  
348 with the increased level of reduced GSH and the enhanced reducing power of the cell.

349 Based on the evidence demonstrated in this study, a novel signal model of H<sub>2</sub>S promoting  
350 seed germination is proposed (Fig. 5). This study presents the regulatory effects of H<sub>2</sub>S on  
351 respiration pattern, involving the improvement of the proportion of AOX mediated cyanide-  
352 resistant respiration, in germinating seeds. On the one hand, H<sub>2</sub>S could up-regulate the *AOX1A*  
353 expression to stimulate the cyanide-resistant respiration in imbibed seeds, on the other hand,  
354 H<sub>2</sub>S mediates the post-translational modification of AOX to keep AOX in its reduced and active  
355 state, a process that mainly involves the enhancement of the reducing power of cell by elevating  
356 the reduced GSH level and GSH/GSSG ratio. Collectively, gasotransmitter H<sub>2</sub>S activates AOX  
357 activity from both long-term (gene expression) and short-term (post-translational modification,  
358 allosteric activation) regulatory modes, thus enhances cyanide-resistant respiration to  
359 accelerate seed germination.

360

## 361 **Acknowledgments**

362 This work is supported by a start-up fund from Zhejiang Agricultural & Forestry  
363 University (Grant No. 2020FR035), and a fund from the Natural Science Foundation  
364 of Zhejiang Province (Grant No. Q21C060002) to HF.

365

## 366 **References:**

367

368 **Alvarez C, Calo L, Romero LC, Garcia I, Gotor C.** 2010. An O-acetylserine(thiol)lyase homolog with  
369 L-cysteine desulfhydrase activity regulates cysteine homeostasis in Arabidopsis. *Plant Physiology* **152**,  
370 656-669.

371 **Alvarez C, García I, Romero LC, Gotor C.** 2012. Mitochondrial sulfide detoxification requires a  
372 functional isoform O-acetylserine(thiol)lyase C in Arabidopsis thaliana. *Molecular Plant* **5**, 1217-1226.

373 **Arif Y, Hayat S, Yusuf M, Bajguz A.** 2021. Hydrogen sulfide: A versatile gaseous molecule in plants.  
374 *Plant Physiol Biochem* **158**, 372-384.

- 375 **Aroca A, Gotor C, Romero LC.** 2018. Hydrogen Sulfide Signaling in Plants: Emerging Roles of Protein  
376 Persulfidation. *Frontiers in Plant Science* **9**, 1369.
- 377 **Aroca A, Serna A, Gotor C, Romero LC.** 2015. S-sulfhydration: a cysteine posttranslational  
378 modification in plant systems. *Plant Physiology* **168**, 334-342.
- 379 **Baudouin E, Poilevey A, Hewage NI, Cochet F, Puyaubert J, Bailly C.** 2016. The Significance of  
380 Hydrogen Sulfide for Arabidopsis Seed Germination. *Frontiers in Plant Science* **7**, 930.
- 381 **Bethke PC, Libourel IG, Reinohl V, Jones RL.** 2006. Sodium nitroprusside, cyanide, nitrite, and nitrate  
382 break Arabidopsis seed dormancy in a nitric oxide-dependent manner. *Planta* **223**, 805-812.
- 383 **Bhardwaj S, Kapoor D.** 2021. General view on H<sub>2</sub>S and abiotic stress tolerance in plants. *Hydrogen*  
384 *Sulfide in Plant Biology*, 113-132.
- 385 **Burguillo PL, Nicolas G.** 1977. Appearance of an alternate pathway cyanide-resistant during  
386 germination of seeds of *Cicer arietinum*. *Plant Physiology* **60**, 524-527.
- 387 **Chen Z, Huang Y, Yang W, Chang G, Li P, Wei J, Yuan X, Huang J, Hu X.** 2019. The hydrogen  
388 sulfide signal enhances seed germination tolerance to high temperatures by retaining nuclear COP1 for  
389 HY5 degradation. *Plant Science* **285**, 34-43.
- 390 **Corpas FJ.** 2019. Hydrogen Sulfide: A New Warrior against Abiotic Stress. *Trends in Plant Science* **24**,  
391 983-988.
- 392 **Corpas FJ, González-Gordo S, Cañas A, Palma JM.** 2019. Nitric oxide (NO) and hydrogen sulfide  
393 (H<sub>2</sub>S) in plants: which comes first? *Journal of Experimental Botany*. **70**, 4391-4404.
- 394 **Day DA, Wiskich JT.** 1995. Regulation of alternative oxidase activity in higher plants. *Journal of*  
395 *Bioenergetics & Biomembranes* **27**, 379-385.
- 396 **Dobrzynska U, Gniazdowska A, Babanczyk T, Bogatek R.** 2005. Cyanide and nitric oxide as  
397 regulatory factors of seed germination. *Biological Letters* **42**, 151.
- 398 **Dooley FD, Nair SP, Ward PD.** 2013. Increased growth and germination success in plants following  
399 hydrogen sulfide administration. *PloS One* **8**, e62048.
- 400 **Esashi Y, Isuzugawa K, Matsuyama S, Ashino H, Hasegawa R.** 2006. Endogenous evolution of HCN  
401 during pre-germination periods in many seed species. *Physiologia Plantarum* **83**(1), 27-33.
- 402 **Esashi Y, Wakabayashi S, Tsukada Y, Satoh S.** 1979. Possible involvement of the alternative  
403 respiration system in the ethylene-stimulated germination of cocklebur seeds. *Plant Physiology* **63**, 1039-  
404 1043.
- 405 **Fang H, Jing T, Liu Z, Zhang L, Jin Z, Pei Y.** 2014. Hydrogen sulfide interacts with calcium signaling  
406 to enhance the chromium tolerance in *Setaria italica*. *Cell Calcium* **56**, 472-481.
- 407 **Fang H, Liu Z, Long Y, et al.** 2017. The Ca<sup>2+</sup>/calmodulin2-binding transcription factor TGA3 elevates  
408 LCD expression and H<sub>2</sub>S production to bolster Cr<sup>6+</sup> tolerance in Arabidopsis. *The Plant Journal* **91**, 1038-  
409 1050.
- 410 **Finch-Savage WE, Bassel GW.** 2016. Seed vigour and crop establishment, extending performance  
411 beyond adaptation. *Journal of Experimental Botany* **67**, 567-591.
- 412 **Garcia I, Castellano JM, Vioque B, Solano R, Gotor C, Romero LC.** 2010. Mitochondrial beta-  
413 cyanoalanine synthase is essential for root hair formation in Arabidopsis thaliana. *Plant Cell* **22**, 3268-  
414 3279.
- 415 **Gniazdowska A, Krasuska U, Bogatek R.** 2010. Dormancy removal in apple embryos by nitric oxide  
416 or cyanide involves modifications in ethylene biosynthetic pathway. *Planta* **232**, 1397-1407.
- 417 **Harvey A, Millar, And, et al.** 1993. Organic acid activation of the alternative oxidase of plant  
418 mitochondria. *Febs Letters* **329**, 259-262.

- 419 **Jin Z, Pei Y.** 2015. Physiological Implications of Hydrogen Sulfide in Plants: Pleasant Exploration  
420 behind Its Unpleasant Odour. *Oxidative Medicine and Cellular Longevity* **2015**, DOI:  
421 10.1155/2015/397502.
- 422 **Jin Z, Sun L, Yang G, Pei Y.** 2018. Hydrogen sulfide regulates energy production to delay leaf  
423 senescence induced by drought stress in Arabidopsis. *Frontiers in Plant Science* **9**, DOI:  
424 10.3389/fpls.2018.01722.
- 425 **Jin Z, Xue S, Luo Y, Tian B, Fang H, Li H, Pei Y.** 2013. Hydrogen sulfide interacting with abscisic  
426 acid in stomatal regulation responses to drought stress in Arabidopsis. *Plant Physiol Biochem* **62**, 41-46.
- 427 **Lai KW, Yau CP, Tse YC, Jiang L, Yip WK.** 2009. Heterologous expression analyses of rice OsCAS  
428 in Arabidopsis and in yeast provide evidence for its roles in cyanide detoxification rather than in cysteine  
429 synthesis in vivo. *Journal of Experimental Botany* **60**, 993-1008.
- 430 **Laties, GG.** 1982. The cyanide-resistant, alternative path in higher-plant respiration. *Annual Review of*  
431 *Plant Physiology* **33**:519-555.
- 432 **Li ZG, Gong M, Liu P.** 2012. Hydrogen sulfide is a mediator in H<sub>2</sub>O<sub>2</sub>-induced seed germination in  
433 *Jatropha curcas*. *Acta Physiologiae Plantarum* **34**, 2207-2213.
- 434 **Liu H, Wang J, Liu J, Liu T, Xue S.** 2021. Hydrogen sulfide (H<sub>2</sub>S) signaling in plant development and  
435 stress responses. *aBIOTECH*, 1-32.
- 436 **Liu Z, Li Y, Cao C, Liang S, Ma Y, Liu X, Pei Y.** 2019. The role of H<sub>2</sub>S in low temperature-induced  
437 cucurbitacin C increases in cucumber. *Plant Molecular Biology* **99**, 535-544.
- 438 **Millar AH, Hoefnagel M, Day DA, Wiskich JT.** 1996. Specificity of the Organic Acid Activation of  
439 Alternative Oxidase in Plant Mitochondria. *Plant Physiology* **111**, 613-618.
- 440 **Moore AL, Umbach AL, Siedow JN.** 1995. Structure-function relationships of the alternative oxidase  
441 of plant mitochondria, A model of the active site. *Journal of Bioenergetics and Biomembranes* **27**, 367-  
442 377.
- 443 **Oracz K, El-Maarouf-Bouteau H, Bogatek R, Corbineau F, Bailly C.** 2008. Release of sunflower  
444 seed dormancy by cyanide, cross-talk with ethylene signalling pathway. *Journal of Experimental Botany*  
445 **59**, 2241-2251.
- 446 **Oracz K, El-Maarouf-Bouteau H, Kranner I, Bogatek R, Corbineau F, Bailly C.** 2009. The  
447 mechanisms involved in seed dormancy alleviation by hydrogen cyanide unravel the role of reactive  
448 oxygen species as key factors of cellular signaling during germination. *Plant Physiology* **150**, 494-505.
- 449 **Palma JM, Mateos RM, Lopez-Jaramillo J, Rodriguez-Ruiz M, Gonzalez-Gordo S, Lechuga-**  
450 **Sancho AM, Corpas FJ.** 2020. Plant catalases as NO and H<sub>2</sub>S targets. *Redox Biology* **34**, DOI:  
451 10.1016/j.redox.2020.101525.
- 452 **Rajjou L, Duval M, Gallardo K, Catusse J, Bally J, Job C, Job D.** 2012. Seed germination and vigor.  
453 *Annual Review of Plant Biology* **63**, 507-533.
- 454 **Romero LC, Aroca MA, Laureano-Marin AM, Moreno I, Garcia I, Gotor C.** 2014. Cysteine and  
455 cysteine-related signaling pathways in Arabidopsis thaliana. *Molecular Plant* **7**, 264-276.
- 456 **Sluse FE, Jarmuszkiewicz W.** 1998. Alternative oxidase in the branched mitochondrial respiratory  
457 network, an overview on structure, function, regulation, and role. *Brazilian Journal of Medical and*  
458 *Biological Research* **31**, 733-747.
- 459 **Solomonson LP.** 1981. Cyanide as a metabolic inhibitor. *Cyanide in biology*. 11-28.
- 460 **Taylorson RB, Hendricks SB.** 1973. Promotion of seed germination by cyanide. *Plant Physiology* **52**,  
461 23-27.
- 462 **Umbach AL, Siedow JN.** 1993. Covalent and Noncovalent Dimers of the Cyanide-Resistant Alternative

- 463 Oxidase Protein in Higher Plant Mitochondria and Their Relationship to Enzyme Activity. *Plant*  
464 *Physiology* **103**, 845-854.
- 465 **Umbach AL, Siedow JN.** 1997. Changes in the redox state of the alternative oxidase regulatory  
466 sulfhydryl/disulfide system during mitochondrial isolation, implications for inferences of activity in vivo.  
467 *Plant Science* **123**, 19-28.
- 468 **Vanlerberghe GC, Cvetkovska M, Jia W.** 2010. Is the maintenance of homeostatic mitochondrial  
469 signaling during stress a physiological role for alternative oxidase? *Physiologia Plantarum* **137**, 392-406.
- 470 **Vanlerberghe GC, McIntosh L.** 1997. ALTERNATIVE OXIDASE: From Gene to Function. *Annual*  
471 *Review of Plant Physiology and Plant Molecular Biology* **48**, 703-734.
- 472 **Vanlerberghe GC, Vanlerberghe AE, McIntosh L.** 1994. Molecular Genetic Alteration of Plant  
473 Respiration (Silencing and Overexpression of Alternative Oxidase in Transgenic Tobacco). *Plant*  
474 *Physiology* **106**, 1503-1510.
- 475 **Vennesland B, Conn EE, Knowles CJ, Westley J, Wissing F.** 1981. Cyanide in biology. *The Quarterly*  
476 *Review of Biology*, **58**, DOI: 10.1086/413208.
- 477 **Wang R.** 2002. Two's company, three's a crowd, can H<sub>2</sub>S be the third endogenous gaseous transmitter?  
478 *Faseb Journal* **16**, 1792-1798.
- 479 **Yang G, Sun X, Wang R.** 2004. Hydrogen sulfide-induced apoptosis of human aorta smooth muscle  
480 cells via the activation of mitogen-activated protein kinases and caspase-3. *Faseb Journal* **18**, 1782-1784.
- 481 **Yu LL, Liu Y, Peng Y, Zhu F, Xu F.** 2021. Overexpression of cyanoalanine synthase 1 improves  
482 germinability of tobacco seeds under salt stress conditions. *Environmental and Experimental Botany* **182**,  
483 104332.
- 484 **Zengjie Q, Zhang, Liping, Liu, Danmei, Zhiqiang, Jin, Zhuping, Jing.** 2015. H<sub>2</sub>S acting as a  
485 downstream signaling molecule of SA regulates Cd tolerance in Arabidopsis. *Plant and Soil* **393**, 137-  
486 146.
- 487 **Zhang H, Hu LY, Hu KD, He YD, Wang SH, Luo JP.** 2008. Hydrogen sulfide promotes wheat seed  
488 germination and alleviates oxidative damage against copper stress. *Journal of Integrative Plant Biology*  
489 **50**, 1518-1529.
- 490 **Zhang H, Tan ZQ, Hu LY, Wang SH, Luo JP, Jones RL.** 2010. Hydrogen sulfide alleviates aluminum  
491 toxicity in germinating wheat seedlings. *Journal of Integrative Plant Biology* **52**, 556-567.
- 492 **Zhang H, Wang MJ, Hu LY, Wang SH, Luo JP.** 2010. Hydrogen sulfide promotes wheat seed  
493 germination under osmotic stress. *Russian Journal of Plant Physiology* **57**, 532-539.
- 494 **Zhang J, Zhou M, Zhou H, et al.** 2021. Hydrogen sulfide, a signaling molecule in plant stress responses.  
495 *Journal of Integrative Plant Biology* **63**, 146-160.
- 496 **Zhou ZH, Wang Y, Ye XY, Li ZG.** 2018. Signaling Molecule Hydrogen Sulfide Improves Seed  
497 Germination and Seedling Growth of Maize (*Zea mays* L.) Under High Temperature by Inducing  
498 Antioxidant System and Osmolyte Biosynthesis. *Frontiers in Plant Science* **9**, DOI:  
499 10.3389/fpls.2018.01288.

500 **Table 1. List of all primers for qRT-PCR used in this study**

| <b>Genes</b>    | <b>Accession Number</b> | <b>Primer pairs (5'-3')</b>                           |
|-----------------|-------------------------|-------------------------------------------------------|
| <b>OASTL-A1</b> | At4g14880               | F, TATTCCCACAAGAAGACC<br>R, GCCAGTTGAAAGTGCTAT        |
| <b>OASTL-B</b>  | At2g43750               | F, AGCACTTTCCTGGGGTTC<br>R, GAGACGACTGGTCCTGAG        |
| <b>OASTL-C</b>  | At3g59760               | F, AAACGCAGGTTATTGGTG<br>R, TTGCTTTGCGGTTTCTAT        |
| <b>CYS-C1</b>   | At3g61440               | F, GCCACCGTTGAGTATGTT<br>R, CCTGAGATTTGGGAAGAT        |
| <b>CYS-D1</b>   | At3g04940               | F, CCCTGAAAGAAGGATTACTGGT<br>R, ATGAGGTCGATAGGTAACGTT |
| <b>CYS-D2</b>   | AT5G28020               | F, AGGGACTGGTGGAAGTCTA<br>R, ACAATGAGTTTCCCCGCGTT     |
| <b>DES1</b>     | At5g28030               | F, ACCTCTGCACCTAATGCTCTT<br>R, GATTGAGGCAACGGGTGGTAA  |
| <b>LCD</b>      | At3g62130               | F, CAAGCATCAGCCAGCATT<br>R, AGGGATTACAGTTCACAGC       |
| <b>AOX1A</b>    | At3g22370               | F, CACTACCAAGGTCGTGAACTAA<br>R, GCAAAAGATAAGCCCAAAGC  |
| <b>AOX1B</b>    | At3g22360               | F, CAGGAATGGTTGGAGGGA<br>R, GAACGGCAATCACAAGAGC       |
| <b>AOX1C</b>    | At3g 27620              | F, GGAAGTAGCGAAACCCAAAT<br>R, AGCCTCCAGTAATCAACAGC    |
| <b>UBQ4</b>     | At5g20620               | F, GGGCACTCAAGTATCTTGTTAGC<br>R, TGCTGCCCAACATCAGGTT  |

501



502 **Figure and Figure legends**

503 **Fig. 1**

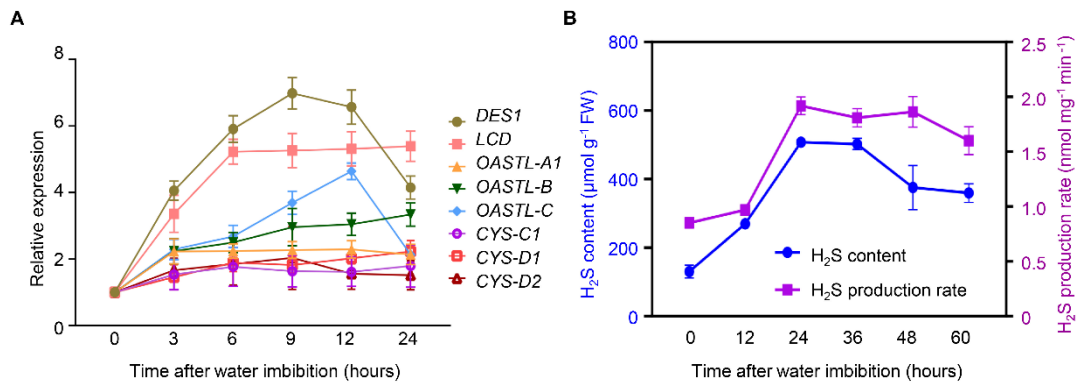

504 **Fig. 1 Endogenous H<sub>2</sub>S production was activated in imbibed Arabidopsis seeds.**

505 (A) Evolution of the expression of H<sub>2</sub>S generation-associated genes with the extension  
506 of imbibition; (B) The production rate and the content of endogenous H<sub>2</sub>S during seed  
507 germination in Arabidopsis.

508 **Fig. 2**

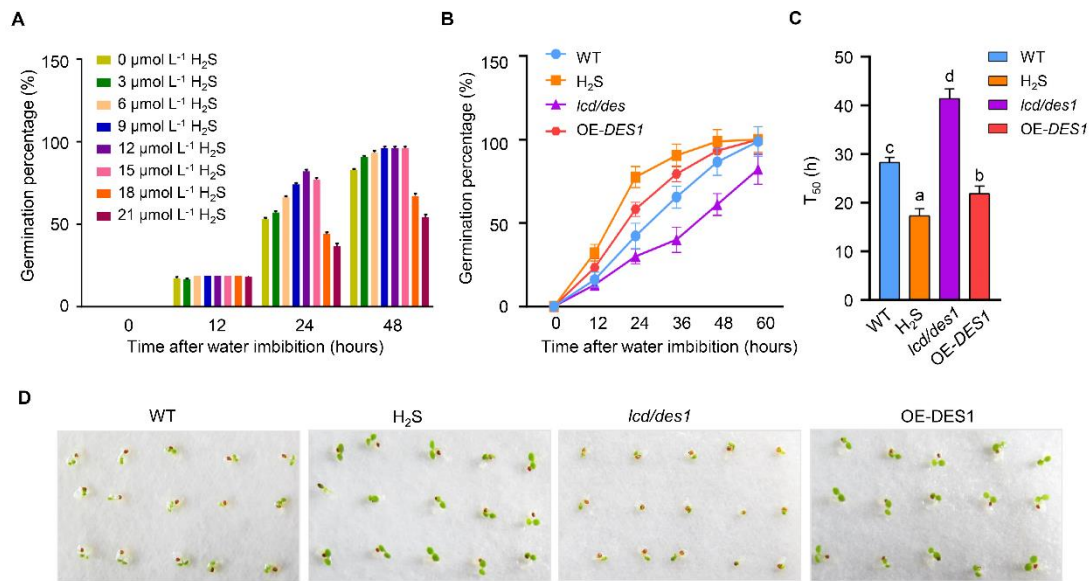

509 **Fig. 2 H<sub>2</sub>S signaling involved in accelerating seed germination in Arabidopsis.**

510 (A) Effects of exogenous H<sub>2</sub>S, employing the NaHS as H<sub>2</sub>S donor, at different  
511 concentrations (0, 3, 6, 9, 12, 15, 18, 21  $\mu\text{mol L}^{-1}$ ) on the speed of seeds germination.

512 (B) The germination percentages with the extension of imbibition and (C) the time to  
513 obtain 50% of germinated seeds in WT seeds, exogenous H<sub>2</sub>S fumigated seeds, *lcd/des1*

514 double mutant seeds and *DES1* over-expressed (OE-*DES1*) seeds. (D) The phenotypes

515 of germinated WT seeds, exogenous H<sub>2</sub>S fumigated seeds, *lcd/des1* double mutant

516 seeds and OE-*DES1* seeds after 60 hours of imbibition.

517 **Fig. 3**

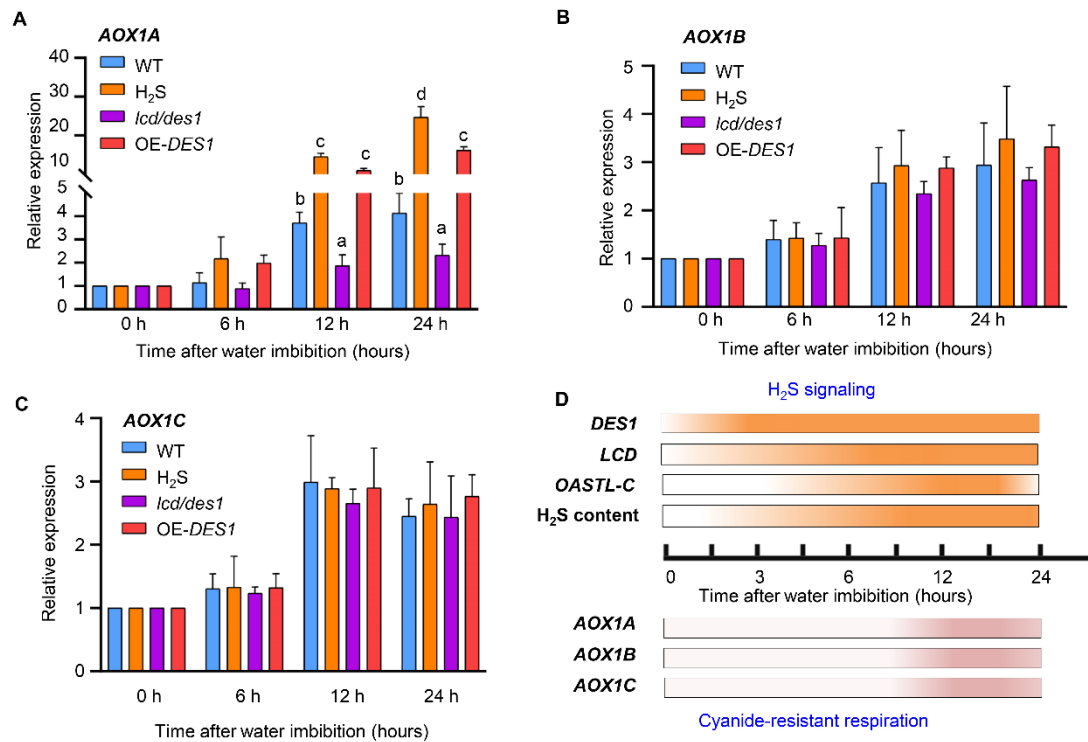

518 **Fig. 3 Gasotransmitter H<sub>2</sub>S up-regulated the transcription of AOX encoding genes.**  
519 The expression of (A) *AOX1A*, (B) *AOX1B*, and (C) *AOX1C* in WT seeds, exogenous  
520 H<sub>2</sub>S fumigated seeds, *lcd/des1* double mutant seeds and OE-*DES1* seeds with the  
521 extension of imbibition. (D) Endogenous H<sub>2</sub>S signaling was activated early than the  
522 *AOX* genes expression during seed imbibition.

523 **Fig. 4**

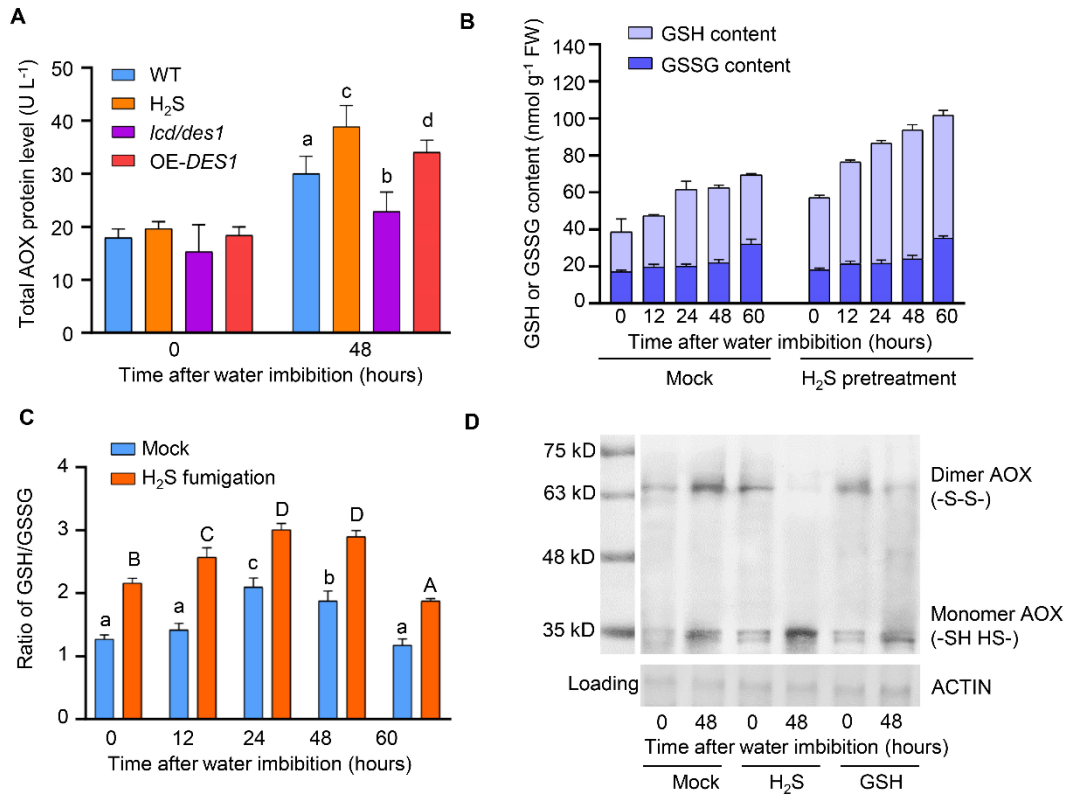

524 **Fig. 4 H<sub>2</sub>S activated the AOX activity via enhancing reduced GSH level and**  
 525 **GSH/GSSG ratio during seed germination.**

526 (A) Effects of H<sub>2</sub>S signaling on the total AOX protein level in germinating seeds. (B)  
 527 Effects of H<sub>2</sub>S fumigation on the reduced GSH and oxidized GSSG content in imbibed  
 528 seeds. (B) Effects of H<sub>2</sub>S fumigation on the ratio of reduced GSH to oxidized GSSG in  
 529 imbibed seeds. (D) Effects of H<sub>2</sub>S and GSH on the redox state of AOX.

530 **Fig. 5**

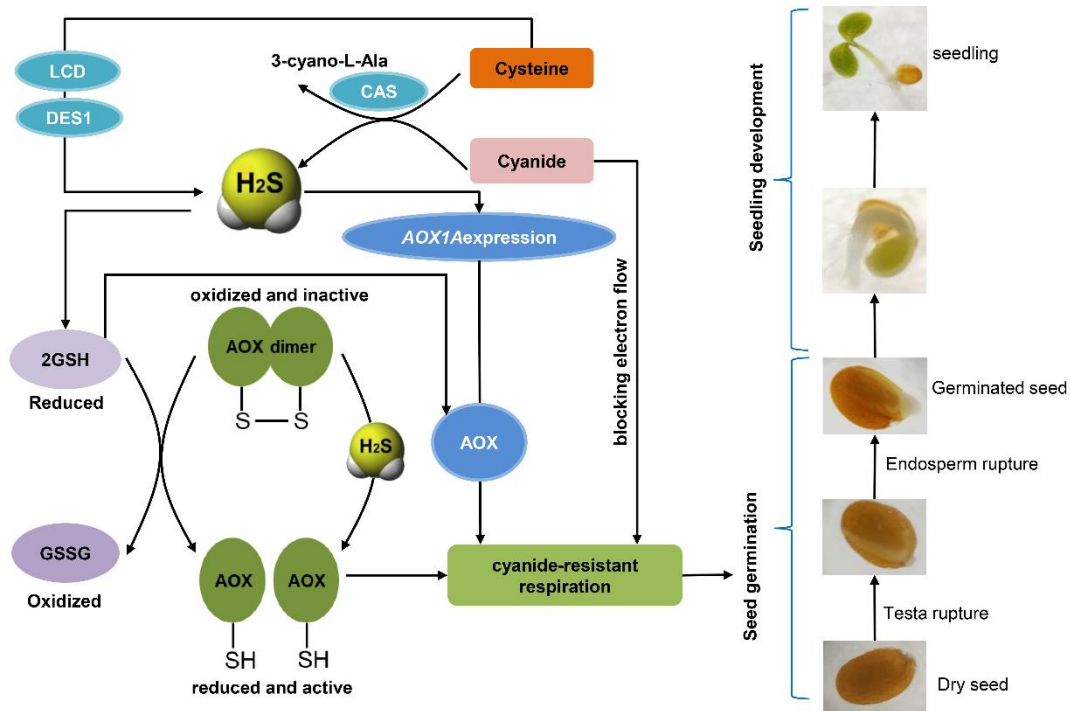

531 **Fig. 5 Model for gasotransmitter H<sub>2</sub>S promoting seed germination via enhancing**  
 532 **AOX mediated cyanide-resistant respiration.**

533 Gasotransmitter H<sub>2</sub>S activates the AOX mediated cyanide-resistant respiration by up-  
 534 regulating both the transcription of *AOX1A* and the protein abundance of AOX, and  
 535 inducing the post-translational modification of AOX to keep more AOX in its reduced  
 536 and active state through the improvement of cell reducing power and the elevation of  
 537 reduced GSH level and GSH/GSSG ratio. Collectively, H<sub>2</sub>S activates AOX activity by  
 538 both long-term (gene expression) and short-term (post-translational modification,  
 539 allosteric activation) regulatory modes, thus enhances AOX mediated cyanide-resistant  
 540 respiration to accelerate seed germination.
